# Supplementary material for: Finding a Missing Gene: EFG1 Regulates Morphogenesis in Candida tropicalis
Source: Oxford University Press journal article supplement (doi:10.1534/g3.115.017566), 2015-03-10
Supplement: 017566_tables1.xlsx [file 017566_tables1.xlsx]

## Sheet: raw_format
EMO348	EMO348	GTGGGSCAATWCCARCCACC	5' primer to verify the absence of EFG1 in C. tropicalis
EMO352	EMO352	TTCAAATGGAATCCAGACWCC	3' primer to verify the absence of EFG1 in C. tropicalis
EMO390	EMO390	TGGAATCCAGACTCCTTTCAA	3' primer to verify the absence of EFG1 in C. tropicalis
EMO391	EMO391	ACTACATGTTCTATCAACAACA	5' primer to verify the absence of EFG1 in C. tropicalis giving a longer product
EMO407	EMO407	CCCTATTACAATCAAATGAACGGAAA	5' primer to verify the absence of EFG1 in C. tropicalis giving a longer product II
EMO412	EMO412	TGSACMGATCTAGTTTCTGYACCACCA	5' primer to verify the absence of EFG1 in C. tropicalis giving a longer product II
EMO413	EMO413	TGCATTTGAAAGGAGTCTGG	5' primer to verify the absence of EFG1 in C. tropicalis giving a longer product II
EMO416	EMO416	AATTGAAGAGACAAGCAAACAAACGA	5' primer to verify the absence of EFG1 in C. tropicalis giving a longer product III
EMO420	EMO420	ATATTAATGTCAACGTATTCTATACC	5' primer to verify the absence of EFG1 in C. tropicalis giving a longer product III
EMO421	EMO421	AGCAGCTCCTTGAGGTTGTT	3' primer to verify the absence of EFG1 in C. tropicalis giving a longer product III
EMO429	EMO429	aaatcaatctgcccaacagc	5' primer to amplify the whole EFG1 amplified region in C. tropicalis
EMO430	EMO430	TGGAATCCAGACTCCtttcaa	3' primer to amplify the whole EFG1 amplified region in C. tropicalis
EMO433	EMO433	ACAAgctgctgctggtca	5' primer to amplify the whole EFG1 amplified region in C. tropicalis
EMO435	EMO435	ATGATATTAATGTCAACGTATTCTATACCT	5' primer to amplify the whole EFG1 amplified region in C. tropicalis

## Sheet: supp_table1
Name	Sequence	Orientation	Amplification roud
EMO348	GTGGGSCAATWCCARCCACC	5'	Initial
EMO352	TTCAAATGGAATCCAGACWCC	3'	Initial
EMO390	TGGAATCCAGACTCCTTTCAA	3'	Extension
EMO391	ACTACATGTTCTATCAACAACA	5'	Extension
EMO407	CCCTATTACAATCAAATGAACGGAAA	5'	Extension
EMO412	TGSACMGATCTAGTTTCTGYACCACCA	5'	Extension
EMO413	TGCATTTGAAAGGAGTCTGG	5'	Extension
EMO416	AATTGAAGAGACAAGCAAACAAACGA	5'	Extension
EMO420	ATATTAATGTCAACGTATTCTATACC	5'	Extension
EMO421	AGCAGCTCCTTGAGGTTGTT	3'	Extension
EMO429	AAATCAATCTGCCCAACAGC	5'	Extension
EMO430	TGGAATCCAGACTCCTTTCAA	3'	Extension
EMO433	ACAAGCTGCTGCTGGTCA	5'	Extension
EMO435	ATGATATTAATGTCAACGTATTCTATACCT	5'	Extension
