# Supplementary material for: Finding a Missing Gene: EFG1 Regulates Morphogenesis in Candida tropicalis
Source: Oxford University Press journal article supplement (doi:10.1534/g3.115.017566), 2015-03-10
Supplement: 017566_tables2.xlsx [file 017566_tables2.xlsx]

## Sheet: Sheet1
Species	Strain	Genotype	MTL	Strain Background	Reference
C. tropicalis	CEM010	WT	a/α	MYA3404	This study
C. tropicalis	CEM206	leu2Δ::FRT/leu2Δ::FRT	a/α	MYA3404	This study
C. tropicalis	CEM207	leu2Δ::FRT/leu2Δ::FRT	a/α	MYA3404	This study
C. tropicalis	CEM245	leu2Δ::FRT/leu2Δ::FRT efh1Δ::LEU2/efh1Δ::HYG	a/α	MYA3404	This study
C. tropicalis	CEM246	leu2Δ::FRT/leu2Δ::FRT efh1Δ::LEU2/efh1Δ::HYG	a/α	MYA3404	This study
C. tropicalis	CEM274	efg1:SAT1-CamR cassette/EFG1	a/α	MYA3404	This study
C. tropicalis	CEM275	efg1:SAT1-CamR cassette/EFG1	a/α	MYA3404	This study
C. tropicalis	CEM279	leu2Δ::FRT/leu2Δ::FRT efg1Δ::LEU2/efg1Δ::HYG	a/α	MYA3404	This study
C. tropicalis	CEM280	leu2Δ::FRT/leu2Δ::FRT efg1Δ::LEU2/efg1Δ::HYG	a/α	MYA3404	This study
C. tropicalis	CAY3741	arg4Δ::FRT/arg4Δ::FRT his1Δ::FRT/his1Δ::FRT	a/a	MYA3404	This study
C. tropicalis	CAY5980	arg4Δ::FRT/arg4Δ::FRT his1Δ::FRT/his1Δ::FRT efg1::HIS1/EFG1	a/a	MYA3404	This study
C. tropicalis	CAY6027	arg4Δ::FRT/arg4Δ::FRT his1Δ::FRT/his1Δ::FRT efg1::HIS1/efg1::ARG4	a/a	MYA3404	This study
C. tropicalis	CAY2597	WT	a/a	AM2005/0093	This study
C. tropicalis	CAY3764	his1Δ::FRT/his1Δ::FRT leu2Δ::FRT/leu2Δ::FRT	a/a	AM2005/0093	This study
C. tropicalis	CAY5981	his1Δ::FRT/his1Δ::FRT leu2Δ::FRT/leu2Δ::FRT efg1::LEU2/EFG1	a/a	AM2005/0093	This study
C. tropicalis	CAY5985	his1Δ::FRT/his1Δ::FRT leu2Δ::FRT/leu2Δ::FRT efg1::LEU2/efg1::HIS1	a/a	AM2005/0093	This study
C. tropicalis	CAY5982	his1Δ::FRT/his1Δ::FRT leu2Δ::FRT/leu2Δ::FRT efg1::LEU2/EFG1	a/a	AM2005/0093	This study
C. tropicalis	CAY6024	his1Δ::FRT/his1Δ::FRT leu2Δ::FRT/leu2Δ::FRT efg1::LEU2/efg1::HIS1	a/a	AM2005/0093	This study
C. albicans	TF156	arg4Δ/arg4Δ leu2Δ/leu2Δ his1Δ/his1Δ URA3/ura3Δ::imm434 IRO1/iro1Δ::imm434 efg1Δ::HIS1/efg1Δ::LEU2	a/α	SC5314	Homann et al., 2009
